# Supplementary material for: Human PNPLA3-I148M variant increases hepatic retention of polyunsaturated fatty acids
Source: JCI journal article supplement (doi:10.1172/jci.insight.127902), 2019-08-21
Supplement: sd1 [file 1]

You are being redirected.
